# Supplementary figures and images for: The Bacterial Microbiome in the Small Intestine of Hooded Seals (Cystophora cristata)
Source: MDPI journal article supplement (doi:10.3390/microorganisms8111664), 2020-10-27

**a.**

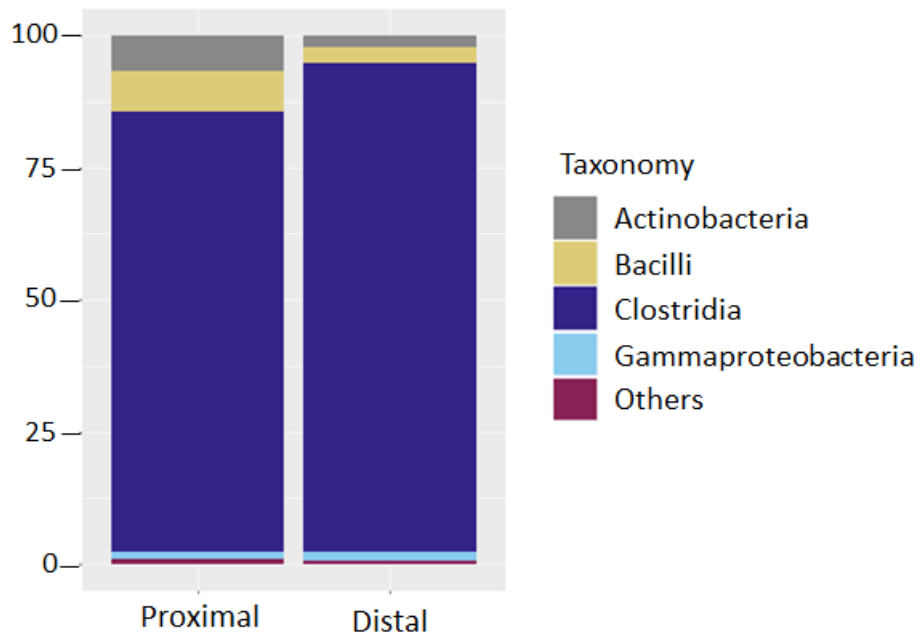

**b.**

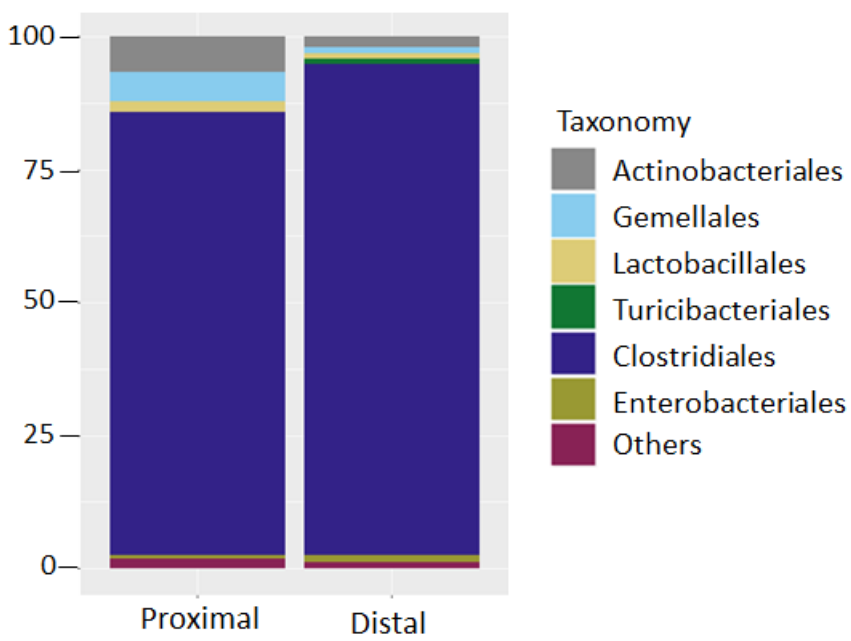

**c.**

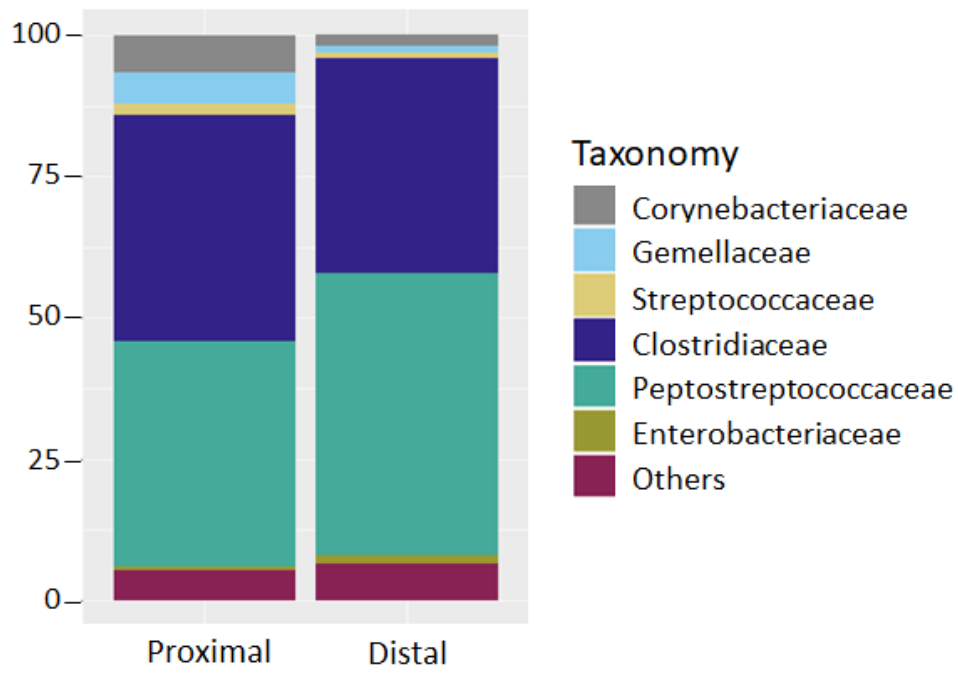

Supplement: s1 [file s1]

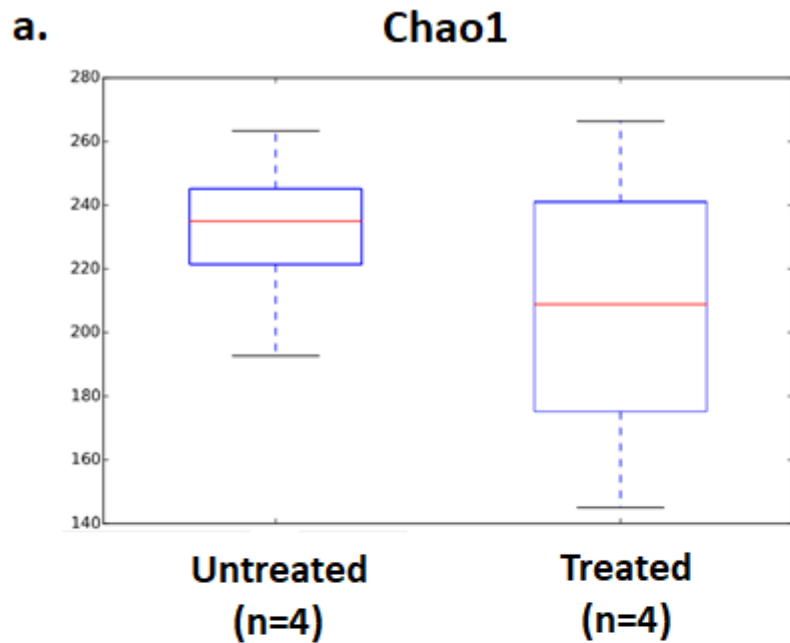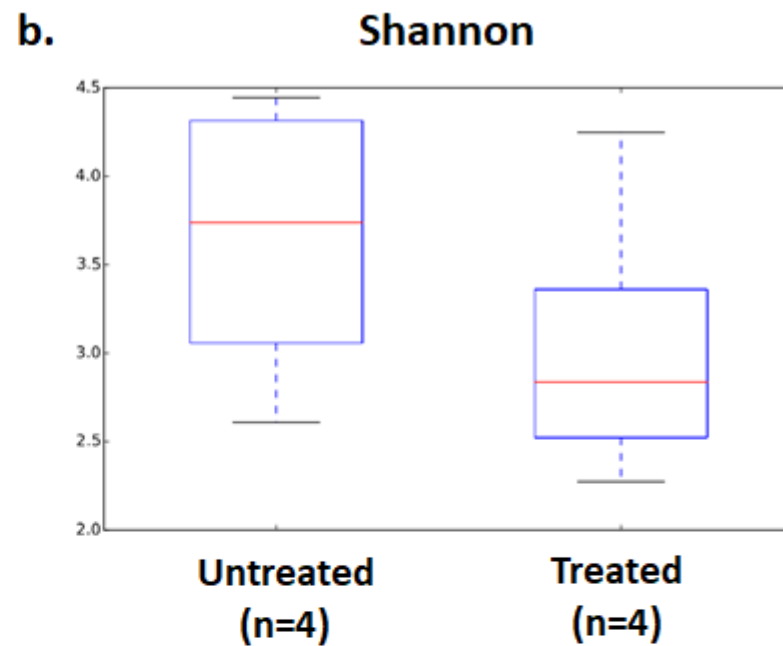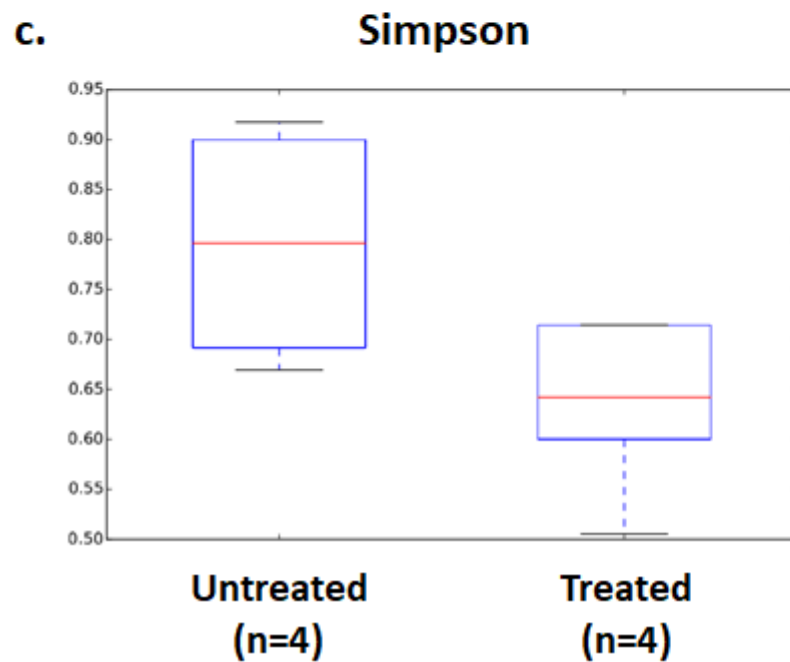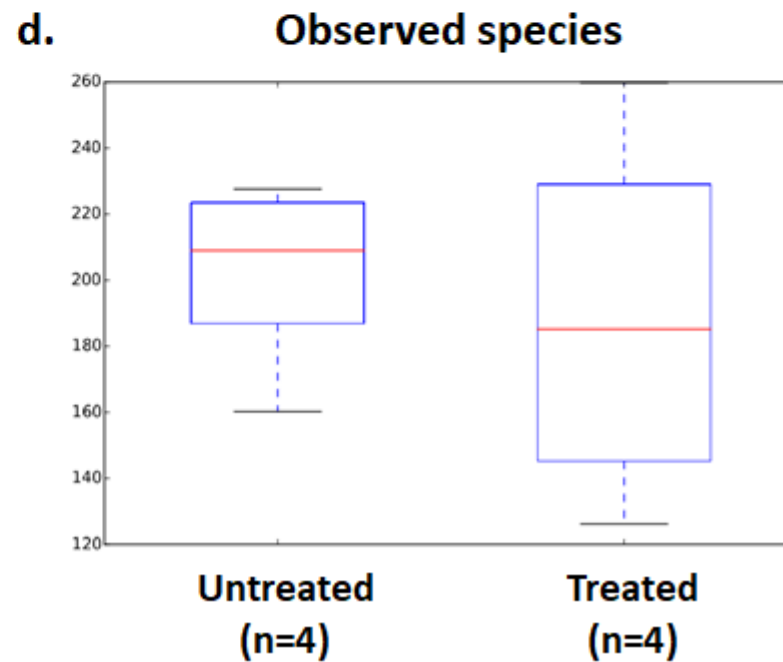

Supplement: s1 [file s1]
